# Supplementary material
Source: PubMed Central journal article supplement (PMC4654764)

Relation Between Luminscent Intensity and Bacterial Load in Middle Ear

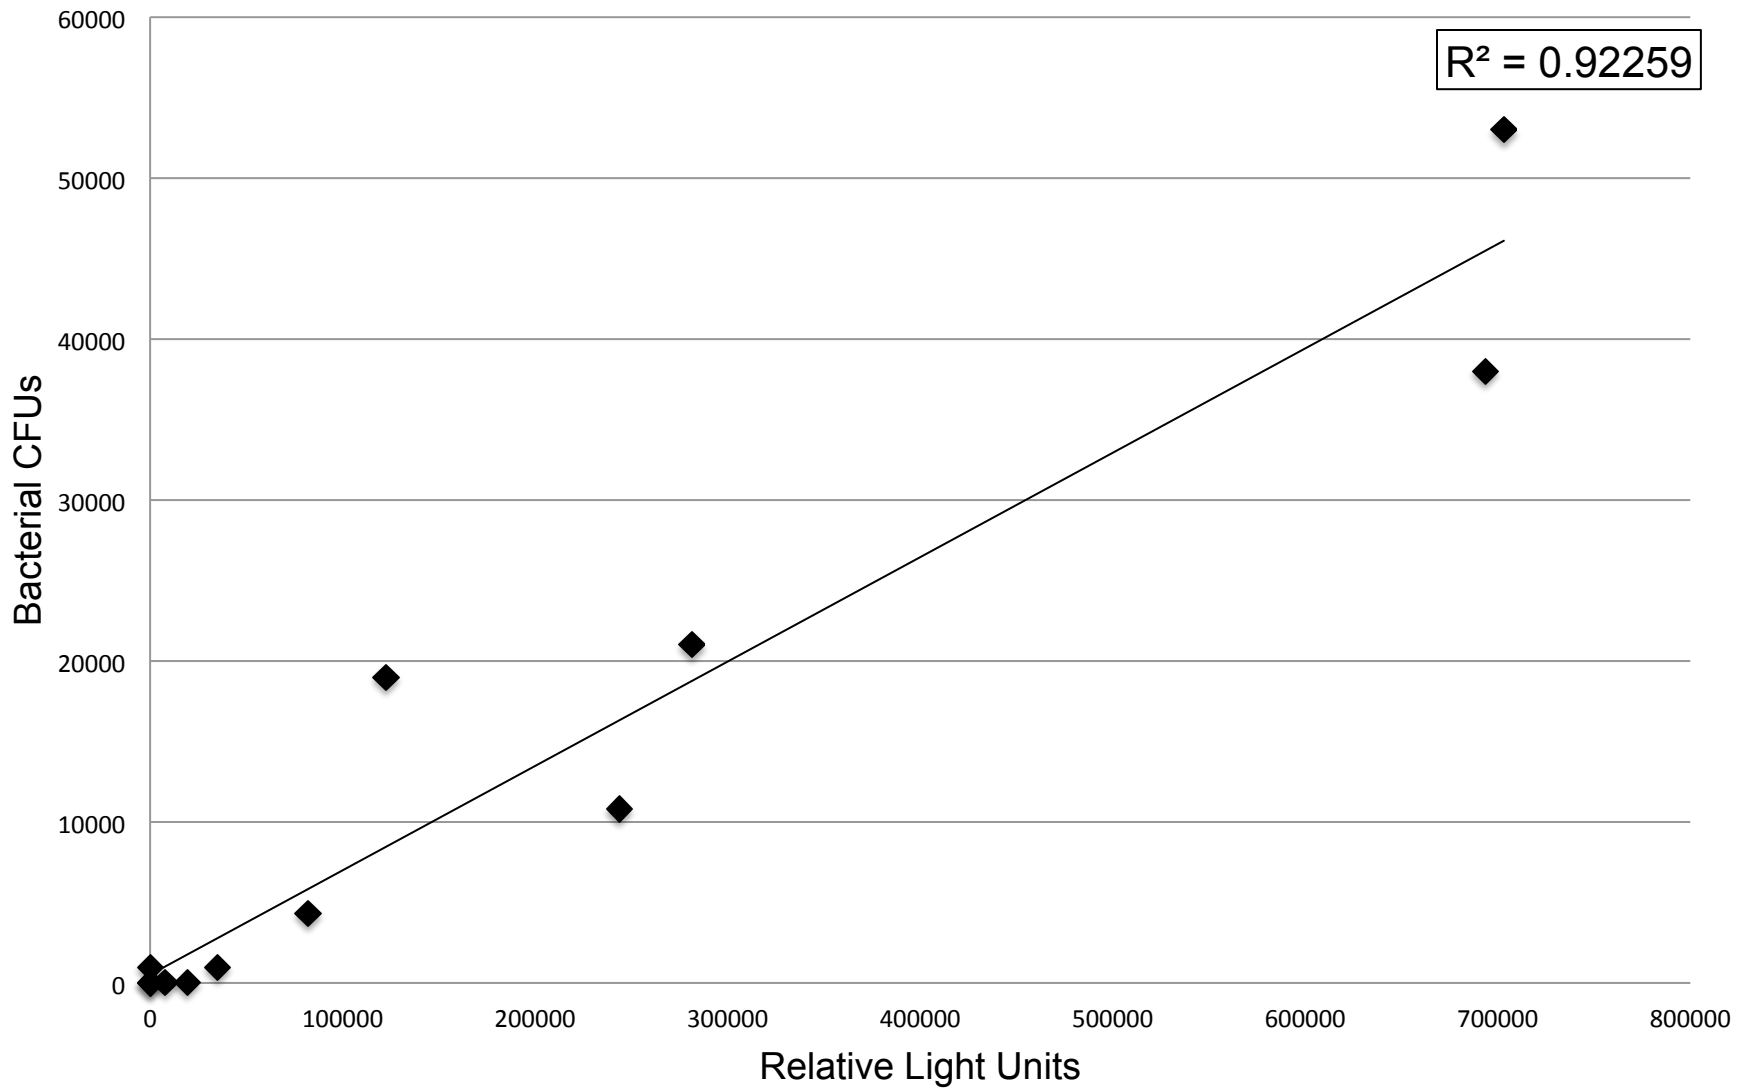

Supplement: supp_jiu804_jiu804supp.pdf [file supp_jiu804_jiu804supp.pdf]
